1 Copy number variants in the sheep genome detected using multiple approaches

2

3 Gemma M Jenkins <sup>1\*</sup>

4 \*corresponding author

5 Email: gjenkins@abacusbio.co.nz

6

7 Michael E Goddard <sup>2</sup>

8 Email: mike.goddard@ecodev.vic.gov.au

9

10 Michael A Black <sup>3</sup>

11 Email: mik.black@otago.ac.nz

12

13 Rudiger Brauning <sup>4</sup>

14 Email: rudiger.brauning@agresearch.co.nz

15

16 Benoit Auvray <sup>3</sup>

17 Email: bauvray@maths.otago.ac.nz

18

19 Ken G Dodds <sup>4</sup>

20 Email: ken.dodds@agresearch.co.nz

21

22 James W Kijas <sup>5</sup>

23 Email: james.kijas@csiro.au

24

25 Noelle Cockett <sup>6</sup>

26 Email: noelle.cockett@usu.edu

27

28 John C McEwan <sup>4</sup>

29 Email: john.mcewan@agresearch.co.nz

30

31 <sup>1</sup> AbacusBio Limited, 442 Moray Place, PO Box 5585, Dunedin 9058, NEW ZEALAND

32 <sup>2</sup> Victorian Department of Economic Development, Jobs, Transport and Resources, Bundoora, VIC

33 3083, AUSTRALIA

34 <sup>3</sup> Department of Biochemistry, University of Otago, 710 Cumberland St, Dunedin 9054, NEW

35 ZEALAND

36 <sup>4</sup> AgResearch, Invermay Agricultural Centre, PB 50034, Mosgiel 9053, NEW ZEALAND

37 <sup>5</sup> CSIRO Animal, Food and Health Sciences, Queensland Bioscience Precinct, 306 Carmody Road.

38 St Lucia, QLD 4067, AUSTRALIA

39 <sup>6</sup> Utah State University, 1435 Old Main Hill, Logan, UT 84322-1435-1435, USA

40

41 **Keywords:** sheep, copy number variants, array CGH, SNP, sequence

42

43 **Abstract**

44 **Background.** Copy number variants (CNVs) are a type of polymorphism found to underlie phenotypic  
45 variation, both in humans and livestock. Most surveys of CNV in livestock have been conducted in  
46 the cattle genome, and often utilise only a single approach for the detection of copy number  
47 differences. Here we performed a study of CNV in sheep, using multiple methods to identify and  
48 characterise copy number changes. Comprehensive information from small pedigrees (trios) was  
49 collected using multiple platforms (array CGH, SNP chip and whole genome sequence data), with  
50 these data then analysed via multiple approaches to identify and verify CNVs.

51 **Results.** In total, 3,488 autosomal CNV regions (CNVRs) were identified in this study, which  
52 substantially builds on an initial survey of the sheep genome that identified 135 CNVRs. The average  
53 length of the identified CNVRs was 19kb (range of 1kb to 3.6Mb), with shorter CNVRs being more  
54 frequent than longer CNVRs. The total length of all CNVRs was 67.6Mbps, which equates to 2.7% of  
55 the sheep autosomes. For individuals this value ranged from 0.24 to 0.55%, and the majority of  
56 CNVRs were identified in single animals. Rather than being uniformly distributed throughout the  
57 genome, CNVRs tended to be clustered. Application of three independent approaches for CNVR  
58 detection facilitated a comparison of validation rates. CNVs identified on the Roche-NimbleGen  
59 2.1M CGH array generally had low validation rates with lower density arrays, while whole genome  
60 sequence data had the highest validation rate (>60%).

61 **Conclusions.** This study represents the first comprehensive survey of the distribution, prevalence  
62 and characteristics of CNVR in sheep. Multiple approaches were used to detect CNV regions and it  
63 appears that the best method for verifying CNVR on a large scale involves using a combination of  
64 detection methodologies. The characteristics of the 3,488 autosomal CNV regions identified in this  
65 study are comparable to other CNV regions reported in the literature and provide a valuable and  
66 sizeable addition to the small subset of published sheep CNVs.

67

68 **Background**

69 Copy number variants (CNVs) are a type of genomic polymorphism that potentially underlie a  
70 significant fraction of phenotypic variation [1]. CNVs are structural variants, defined as stretches of  
71 DNA that are greater than 1 kilobase (kb) in size and are duplicated or deleted in the genome of  
72 some individuals [2]. Mutation rate estimates for CNVs vary from  $1.1 \times 10^{-2}$  [3] to  $1 \times 10^{-8}$  per locus per  
73 generation [4, 5], which reflects the diverse processes by which CNVs are created. They can be over  
74 1 megabase (Mb) [6] and are thought to comprise approximately 1% of an individual's genome,  
75 which is much higher than the 0.1% thought to comprise SNPs [7, 8]. CNVs can be present in the  
76 same or overlapping regions of the genome in multiple individuals, these regions are called copy  
77 number variant regions (CNVRs). Copy number variants are distinct from another type of variant,  
78 indels (INsertions/DEletionS), in that indels are typically less than 1kb [2]. By definition they are also  
79 distinct from segmental duplications (SD). Segmental duplications are defined as being over 1kb in  
80 length with at least 90% sequence identity between the duplicated segments and are often not  
81 polymorphic in the population [9]. In many cases it is likely that segmental duplications were once  
82 CNVs that have subsequently become fixed in the population.

83

84 There are many examples, particularly in humans, of CNVs influencing traits. These include multiple  
85 examples of CNVs associated with cancer susceptibility [10-12], the association of the FCGR3B gene  
86 copy number variant with systemic lupus erythematosus (SLE) [13], and CCL3L1 gene copy number,  
87 which has been linked to HIV susceptibility [14]. There is also evidence for CNVs influencing traits in  
88 other animal and livestock species. A 133kb duplication containing four genes causes hair ridge in  
89 Rhodesian and Thai Ridgeback dogs [15]. The chicken Peacomb phenotype is under sexual selection  
90 and is caused by a 3.2 kb duplication in an intron of the SOX5 gene [16]. The Peacomb allele contains  
91 ~30 copies of the duplication, with variation in copy number present within individuals with the  
92 Peacomb phenotype. In pigs, Chen *et al* [17] found seven copy number variable genes that

93 overlapped quantitative trait loci (QTL) for, among other traits, carcass length, backfat thickness,  
94 abdominal fat weight, length of scapular, intramuscular fat content of *longissimus* muscle, body  
95 weight at 240 days and glycolytic potential of longissimus muscle. Although not an association  
96 analysis, Chen *et al* [17] identified one CNV that had previously been associated with skin colour in  
97 pigs [18].

98

99 There have been many CNV studies in cattle, with a range of platforms used to identify CNVs [19-26].  
100 Between 51 and 1265 CNVRs [20, 22] have been identified in the various cattle studies, with  
101 estimates of the proportion of the cattle genome thought to contain CNVRs ranging from 0.5 to 20%  
102 [22, 24]. Although the latter is likely to be an overestimate, the wide range in estimates is likely due  
103 to a number of factors, including the technology used to detect CNVs, different CNV calling criteria  
104 used, and the number of animals examined

105

106 While there is one notable example of a CNV having a direct effect on a sheep trait – the agouti  
107 duplication influencing coat colour [27] - to date, little work has been published on copy number  
108 variants in the sheep genome. An initial survey assayed eleven sheep on a cattle Roche-NimbleGen  
109 385K oligonucleotide CGH array (oligo aCGH) which included 385,000 probes that were designed  
110 based on the cattle genome build btau\_4.0 [28]. That study identified 135 CNV regions (CNVR) that  
111 covered approximately 0.4% of the sheep genome and ~0.01-0.13% of each individual's genome,  
112 which is substantially less than the approximately 1% estimated by Pang *et al* [8] in humans. This  
113 suggests many more sheep CNVs remain to be identified.

114

115 A number of approaches have been used to detect the presence of CNV. The main platforms are  
116 comparative genomic hybridisation (CGH) arrays [29-33], SNP arrays [34-37] and depth of coverage  
117 metrics applied to whole genome sequence data (e.g., [38-42]). Further, there are a variety of  
118 algorithms that can be used to analyse available resultant data. Perhaps the most widely used

119 platform is array CGH, as it represents a cost-effective method to detect CNVs on a genome-wide  
120 scale in multiple individuals [43].

121

122 Trios have been used in CNV studies to determine the de novo mutation rate and to identify CNVs  
123 that represent heritable genetic units [4, 22, 44, 5]. This involves identifying CNVs in a father-  
124 mother-progeny trio. CNVs present in progeny and at least one parent are thought of as heritable  
125 and CNVs present in progeny but not in either parent indicate either a de novo mutation or an error  
126 in CNV identification. Given that CNVs are difficult to detect regardless of the platform or methods  
127 used, the best approach appears to be the conservative use of multiple methods to generate a set of  
128 high confidence CNV calls.

129

130 Given the lack of a comprehensive study of sheep CNVs, the objective of this study was to conduct a  
131 survey of sheep CNVRs using a range of detection methods. A Roche-NimbleGen 2.1M CGH array  
132 was designed and 36 animals (which included sets of trios) were assayed. Independent detection  
133 approaches were used in an attempt to validate the results. Finally, the CNVRs detected in this  
134 study were compared to those reported in an earlier survey of the sheep genome [28] and those  
135 detected in seven separate cattle studies [19, 20, 25, 28, 21-23].

136

## 137 **Results**

### 138 *Roche-NimbleGen 2.1M CGH array construction and application*

139 A total of four methodologies were used to detect CNV, with the main approach being the  
140 development and application of a 2.1M probe CGH array for the sheep genome. In total, 2,012,210  
141 probes were designed with an average spacing across the autosomes of approximately 1.2 Kb. The  
142 array was used to assay a total of 36 sheep genomes, consisting of 30 individuals drawn from the  
143 International Mapping Flock [45] and a further six from a Reference Panel of International Sheep

144 Genomics Consortium (ISGC) sheep (Supplementary Table 1). The Roche-NimbleGen segMNT  
145 algorithm was used to call CNV segments in each animal compared to the reference animal. Many  
146 different algorithms and criteria can be used to identify CNVs in array CGH data. Criteria employed  
147 to filter CGH data include restricting calls based on probe number within the CNV segment and  $\log_2$   
148 ratio (the ratio of test to reference probe intensity values) (Bickhart *et al* (2012); Liu *et al.*, 2010;  
149 Fontanesi *et al.*, 2011); Conrad *et al.*, 2010); (Kijas *et al.*, 2011)). These criteria are often selected  
150 using the results from a self-self hybridisation experiment, whereby self-self calls are used to  
151 indicate false positive calls, and rely on the assumption that the self-self hybridisation CNV calls  
152 cover the range of characteristics of false positive calls. It requires selecting a balance between filter  
153 values for number of probes and  $\log_2$  ratio, so as to eliminate self-self hybridisation calls and other  
154 false positives from the dataset. Other studies have used differences between expected *versus*  
155 observed probe intensities on the sex chromosomes to set  $\log_2$  ratio filters (Conrad *et al.*, 2010).  
156 However, this does not account for possible probe number differences between true versus false  
157 CNV calls. As well as these filtering criteria, trios can be used to identify CNVs (Abecasis *et al.*, 2010;  
158 Kijas *et al.*, 2011; Krumm *et al.*, 2012; Michaelson *et al.*, 2012).

159 In this study, rather than using self-self hybridisation results to empirically set filters to remove false  
160 positives, a combination of trios and self-self hybridisation results were used to develop a logistic  
161 regression model for predicting whether or not a CNV segment represented a true CNV. The logistic  
162 regression model was developed using known positives (trio calls) and known false positives (self-  
163 self hybridisation calls) and the following variables were tested to determine if they were significant  
164 in predicting true versus false CNV segment calls: absolute  $\log_2$  ratio of the CNV segment call;  
165 whether the call was a deletion or duplication; length of the call (base pairs); natural log transformed  
166 length variable; double natural log transformed length variable; the square of the length variable;  
167 number of probes in the CNV segment call; natural log transformed probe variable; double natural  
168 log transformed probe variable; the square of the probe variable; and corresponding two- and three-  
169 way interactions. The variables that were significant in predicting true versus false CNV segment

170 calls were the absolute  $\log_2$  ratio of the CNV segment call, the double natural log transformed length  
171 variable and the double natural log transformed probe variable. The resultant model was then used  
172 to predict true CNVs in the wider dataset, with some further downstream processing. The total  
173 number of autosomal segment calls predicted to represent true CNVs by our model, using CGH data  
174 from 30 animals, was 12,802. After removing calls based on a series of quality filters, a total of 9,789  
175 autosomal CNV calls remained (Table 1). The mean absolute  $\log_2$  ratio of these calls was 0.54 and the  
176 average length was 30kb with a range in length of 1kb-2.5Mb (Table 1).

177

178 On average, 326 CNVs were detected per individual, with a median of 321 and range of 109 to 643.  
179 One animal had notably more CNV calls than the other animals, however, it had the same CNV  
180 content on the autosomes (as a percentage of total length in base pairs) as the other animals.

181

#### 182 *Autosomal CNVR*

183 CNV information from all animals was combined to obtain 3,488 CNV regions on the ovine  
184 autosomes (Supplementary Table 2). The average length of these CNVRs was 19kb, with a range of  
185 1kb to 3.6Mb. Shorter CNVRs were more frequent than longer CNVRs in the genome. The total  
186 length of all CNVRs was 67.6Mbps, which equates to 2.7% of the sheep autosomes. For individuals,  
187 this value ranged from 0.24 to 0.55%. Most CNVRs were seen in just one animal (Figure 1), however  
188 1,424 (41%) were independently called in at least 2 individuals. A small percentage (0.11%) of  
189 CNVRs were observed in all animals, which likely indicates the presence of a CNV in the reference  
190 animal only - the 'reference effect' [46]. The majority of CNVRs (58%) contained only deletion CNVs,  
191 38% of CNVRs contained only duplication CNVs and 4% were compound CNVRs, containing both  
192 duplication and deletion CNVs.

193 The number of CNVRs on each chromosome ranged from 76 on chromosome 27 to 185 on  
194 chromosome 19 (Figure 2). As can be seen in Figure 2, there was a weak positive linear relationship  
195 between chromosome length and number of CNVRs ( $R^2=0.27$ ).

196 The average spacing between CNVRs ranged from one every 347kbp on chromosome 19 to one  
197 every 1.2Mb on chromosome 1. The closest CNVRs were approximately 1.5kb apart, while the  
198 largest distance separating CNVRs was 8.5Mbps. The two-sample Kolmogorov-Smirnov test showed  
199 that the distribution of the CNVRs in the genome (in terms of the inter-CNV distance) was  
200 significantly different to that which would be expected should the CNVRs be uniformly distributed  
201 ( $p\text{-value} = 4.56 \times 10^{-7}$ ). Specifically, the CNVRs tended to be clustered together in the genome (Figure  
202 3).

203

#### 204 *Cross platform verification of autosomal CNVRs in sheep*

205 A small subset of animals assayed with the 2.1M CGH array were also used for data generation with  
206 a lower density 385K CGH array (5 individuals), the OvineSNP50 BeadChip (24 animals) and whole  
207 genome sequence from the six reference panel animals (Supplementary Table 1). This facilitated an  
208 examination of the proportion of CNVRs independently called across platforms.

209

210 The verification rate of CNVRs identified on the 2.1M CGH array on both the 385K CGH array and the  
211 OvineSNP50 BeadChip was low. Results from these analyses are presented in an additional file [see  
212 Additional file 1].

213

214 The final comparison utilised analysis of whole genome sequence from the six reference panel  
215 animals. Each individual was sequenced to between 9.8X and 14X genome wide coverage before  
216 variation in read depth was used to detect CNVR (see Methods). The same six animals had 852  
217 CNVRs arising from 1,164 CNV calls detected using the 2.1M CGH array. Comparing the CNV calls



218 revealed 61% of the Roche-NimbleGen 2.1M CGH array CNV calls were independently identified in  
219 the sequence data (Table 2). Two thirds of the CNV calls that were verified were observed as a  
220 consistent deletion or duplication CNV across platforms in a specific animal. The remaining verified  
221 CNVs were observed as a CNV of the opposite type (deletion versus duplication) in the Poll Dorset  
222 animal. This animal was used as the reference animal on the Roche-NimbleGen 2.1M CGH array and  
223 therefore CNVs in this animal can be incorrectly observed as CNVs in the test animal when in fact no  
224 CNV is present in the test animal. That is, a deletion in the Poll Dorset may be observed as a  
225 duplication in the test animal on the 2.1M CGH array, while in the sequence data, the test animal  
226 shows no CNV in the region but the Poll Dorset shows a deletion. The same is true for duplications in  
227 the Poll Dorset, which will be observed as deletions in the test animal, even if no CNV is present in  
228 the test animal in that region.

229 There were instances where the sequence data showed that there was a CNV in the Poll Dorset and  
230 the test animal in the same region, but the type (duplication/deletion) of CNV in the test animal was  
231 not consistent between the 2.1M CGH array and sequence platforms. For example, a 2.1M CGH  
232 deletion that was observed as a duplication in the test and reference animal in the sequence data.  
233 These calls were considered to be verified as there were still CNVs present in the sequence data and  
234 it is possible that the magnitude of the  $\log_2$  ratio of the CNV call on the 2.1M CGH array was higher in  
235 the Poll Dorset than the test animal which could result in inconsistencies between the types of CNVs  
236 detected. There were instances in the data where a CNV call of one particular CNV region could be  
237 verified in one animal and not in another animal, which indicates that the CNV is likely present in  
238 both animals but the sequence analysis failed to identify the CNV in one of the animals.

239

240 Significant differences in absolute  $\log_2$  ratio, length and GC content were observed between the  
241 sequence verified and non-verified 2.1M CGH array calls. Verified calls had higher absolute  $\log_2$   
242 ratios (0.62 versus 0.50) and were longer (46kb versus 9kb) on average than non-verified calls. This  
243 suggests that longer calls with higher absolute  $\log_2$  ratios are either more likely to represent true

244 CNVs or are easier to verify than shorter calls with lower absolute  $\log_2$  ratios. Sequence  
245 corresponding to non-verified calls showed significantly higher (two-tailed t-test for proportions) GC  
246 content on average compared to verified calls – 44.6 versus 43.0%. Both verified and non-verified  
247 calls had significantly higher GC content compared to the genome average (42.6%). More  
248 duplications (72.4%) than deletions were verified on the sequence platform - 72.4% versus 54.7%.  
249 This is not surprising, as there was less variation in the sequence data in regions with low read  
250 depth, which reduces the ability to detect differences in copy number in these regions and hence  
251 also CNVs relating to deletions.

#### 252 *Comparison of autosomal CNVRs to those identified in the sheep and cattle literature*

253 In total, we detected 378 (18%) of the 2,154 CNVRs reported in seven other sheep and cattle studies.  
254 Of the 2,154 CNVs detected in the seven other studies, 352 were present in more than one study.  
255 We detected 132 (38%) of the 352 CNVs observed in multiple studies, whereas we only detected  
256 14% of the CNVRs observed in just one other study (Table 3). The more frequently a CNVR was  
257 observed in the other studies, the more likely we were to detect the CNVR (Table 3). We were able  
258 to detect 31% of the CNVRs identified in the initial sheep study by Fontanesi *et al* [28] and between  
259 16-62% of CNVRs detected in the cattle studies.

260 Eleven percent of the 3,336 CNVRs detected in this study and successfully mapped to the btau\_4.0  
261 genome overlapped CNVRs in these other studies. This is lower than would be expected based on  
262 overlap between CNVRs from the other studies with each other, which ranges from 20-77%. By  
263 comparison, 28% of the CNVRs from the sheep study by Fontanesi *et al* [28] were observed in at  
264 least one of the cattle studies.

#### 265 *Overlap between autosomal CNVRs and genes*

266 Of the 3,335 CNVRs identified on the Roche-NimbleGen 2.1M CGH array that mapped to OARv3  
267 autosomes, 1,335 (40%) overlapped the coding sequence of one or more genes; 45% of duplication

268 CNVRs, 36% of deletion CNVRs and 59% of deletion/duplication CNVRs overlapped genes. The  
269 proportion of duplications overlapping the coding sequence of genes was significantly different (Chi-  
270 squared test,  $p < 0.0001$ ) to the proportion of deletions overlapping genes. Based on permutation  
271 analysis, these proportions were significantly greater than that which would be expected if the  
272 CNVRs were randomly distributed in the genome ( $p=0.01$ ). Both the agouti signalling protein and  
273 adenosylhomocysteinase genes were overlapped by one of our CNVRs, which confirms the presence  
274 of the agouti duplication reported by Norris and Whan [27] in this dataset, and thus provides a  
275 positive control for the CNVR identification methods presented here. It is important to note that the  
276 agouti duplication can be present in multiple copies [27], hence the reason that it shows up even  
277 upon comparison to another white fleeced sheep.

278

#### 279 *Non-autosomal CNVRs*

280 The total number of chromosome X Roche-NimbleGen 2.1M CGH array segment calls predicted to be  
281 real was 697, however, 308 of these were observed as deletions in males. It is possible some of  
282 these are real, particularly if they are present in the pseudo-autosomal region, however, this cannot  
283 be confirmed in our analysis as we do not have a clear pseudo-autosomal boundary defined. After  
284 filtering all 697 CNV calls based on size and  $\log_2$  ratios, 615 of these were predicted to be real,  
285 however, only 317 were either deletions or duplications in females or duplications in males. These  
286 317 were used to call CNVRs on chromosome X. In total, we estimate there are at least 114 CNVRs  
287 on chromosome X, representing approximately 3.2% of the length of the X chromosome. In addition  
288 to chromosome X CNVRs, four CNVRs were identified on UMD3\_OA\_chrun, observed in one to ten  
289 animals. These CNVRs spanned a total length of 19,304bps.

290

291 Including the 3,488 CNVRs observed on the autosomes, the 114 CNVRs observed on chromosome X  
292 and the 4 CNVRs identified on chromosome unknown (UMD3\_OA\_chrun), we estimate there to be  
293 approximately 3,606 CNVRs in the sheep genome. This includes CNVRs identified on chromosome X

294 and UMD3\_OA\_chrun. The total length of these 3,606 CNVRs is estimated to be 72.4Mbps, however,  
295 it is possible that some of the CNVRs on UMD3\_OA\_chrun may overlap those identified on the  
296 autosomes and therefore this number may be slightly lower.

297

## 298 **Discussion**

299 The results reported here provide a genome wide view of the frequency of CNV, an important class  
300 of genomic variant that is currently poorly characterised in the sheep genome. Using a custom built  
301 Roche-NimbleGen 2.1M CGH array, 9,789 autosomal CNVs were detected in 30 sheep. On average  
302 these CNVs covered 0.4% of each animal's genome. This is higher than that reported in the initial  
303 sheep survey where, on average, 0.05% of an individual sheep genome comprised CNVs [28]. The  
304 difference in estimates is not surprising as this study used a CGH array with 2.1 million probes while  
305 Fontanesi *et al* [28] used a CGH array with 385,000 probes. Based on probe spacing in the genome  
306 and the filters applied to the data, the earlier study detected CNVs greater than 30kb in length, on  
307 average, while this study had a resolution of ~4kb on average. As a result, differences in resolution  
308 may have resulted in differences in the number of CNVs detected. This is reflected in the datasets,  
309 with the average size of CNVs detected by Fontanesi *et al* [28] being 77.6kb (median 55.9kb) and the  
310 average size detected in this study being 30.3kb (median 8.7kb). The individual genome CNV  
311 composition estimates are similar to, but slightly lower than, estimates reported in humans (e.g.,  
312 0.5%, [48]; 0.78%, [7]; and 1.2%, [8]).

313

314 The 9,789 autosomal CNVs reported in this study correspond to 3,488 autosomal CNV regions in the  
315 30 animals tested, representing 2.7% of the sheep genome. This is approximately seven times higher  
316 than estimated in the initial sheep survey [28], which is to be expected as more animals were  
317 assayed in this study. This estimate is similar to the range of estimates in cattle [19, 25, 21, 26, 22,  
318 23, 20] and again similar but slightly lower than estimates in humans (3.7%, [7]; 5%, [48]). Estimates

319 in humans are likely to provide a more accurate estimate of CNV composition in the genome, as  
320 studies have involved more individuals and used a wider range of technologies, often employed  
321 together. As in the Fontanesi *et al* [28] study, this study suffers from the lack of a complete  
322 reference sheep genome. We used a sheep genome that was constructed using a cattle reference  
323 genome to design probes for inclusion on the 2.1M CGH array. The genome used, UMD3\_OA, does  
324 not include any regions that are present in the sheep genome but that are not present in the cattle  
325 genome. This means that sheep CNVs in regions deleted or of low homology in the cattle genome  
326 are likely to have been undetected in this study. Future work will benefit from using a sheep  
327 reference genome for CNV analysis. However, the CNVRs presented in this study provide a  
328 substantial addition to the currently published sheep CNV regions, and bring the resource up to a  
329 level similar to that available in cattle.

330

331 There were also 118 CNVRs identified on chromosome X and chromosome unknown. However,  
332 these were lower confidence calls and were not considered in further analyses. Of the 3,488  
333 autosomal CNVRs identified in this study, 59% were observed in just one animal, which is  
334 comparable to results in the literature [7, 35, 22, 23, 37]. One and a half times more deletions than  
335 duplications were observed. This imbalance is one that is commonly reported in the literature [49,  
336 50, 22] and could be due to ascertainment bias. The ascertainment bias arises because the  
337 proportional difference between probe intensity of test and reference animals is greater for copy  
338 number losses than gains meaning that deletions are easier to detect than duplications.

339

340 The CNVRs detected in this study tended to be clustered together in the genome. This may be an  
341 artefact of the segMNT algorithm and our CNVR calling algorithm, which may have failed to collapse  
342 multiple CNVRs originating from one CNVR into one region. However, similar distributions have  
343 been reported in other studies [5, 51-53] and also for the closely related segmental duplication  
344 variant [9]. If this clustering represents the true underlying distribution in the genome, then it may

345 indicate that the clustered CNVRs are the result of increased mutational activity in repetitive regions  
346 of the genome which could facilitate mechanisms such as non-allelic homologous recombination  
347 [54]. Determining if the CNVRs are a result of one mutational event or multiple mutational events  
348 would require detailed analysis of specific regions, probably using deep sequencing.

349

350 There are reports in the literature that CNVRs are preferentially located outside of gene regions [51,  
351 55, 56, 37] and that those CNVs that do overlap genes are more likely to be duplications than  
352 deletions [7, 57, 37]. The rationale is that deletions are more disruptive to gene function than  
353 duplications and therefore are subject to greater selective pressure. In this study, a significant  
354 difference was observed in the proportion of duplications overlapping the coding sequence of genes  
355 compared to deletions – 0.45 versus 0.36. However, both of these proportions were significantly  
356 higher than would be expected if CNVRs were randomly distributed throughout the genome.

357 Therefore, in this study there is no evidence to suggest that the CNVRs identified in this study are  
358 preferentially excluded from genic regions as has been suggested in the literature. Other results  
359 reported in the literature have also found an enrichment of CNVs in these regions [30, 53]. Cooper *et*  
360 *al* [53] suggest that CNVs that overlap segmental duplications (SDs) are more likely to be enriched in  
361 genic regions, while CNVs that do not overlap SDs are enriched in gene poor regions of the genome.

362 As genes and segmental duplications are GC rich [58] and GC rich regions are more prone to CNV  
363 formation, then it is possible that certain types of CNVs are enriched in genic regions. While  
364 selection against or for CNVs and CNV formation mechanisms are reasonable explanations for the  
365 depletion or enrichment of CNVs in genic regions, it is also possible that differences reported in the  
366 literature are due to ascertainment bias introduced by using different methods for CNV detection.

367 Again, this illustrates the difficulties associated with CNV identification.

368

369 Compared to the lower density 385K CGH array and the OvineSNP50 BeadChip, whole genome  
370 sequencing exhibited the highest cross platform verification rate, with 61% of CNVs verified with this

371 platform. The CNVs that were unable to be verified were shorter and had lower absolute  $\log_2$  ratios  
372 than calls that were able to be verified. Both verified and non-verified CNVs had significantly higher  
373 GC content than the genome average, which supports data from the literature reporting that GC-rich  
374 regions can be more prone to CNV formation [61, 62]. Non-verified CNVs had significantly higher GC  
375 content than verified CNVs. While it is possible that the non-verified CNVs were false negatives in  
376 the sequence analysis, it is also possible that they were false positives in the CGH dataset, as false  
377 positive CGH calls can be related to regions with high GC content [63, 64]. Future work could involve  
378 adjusting CGH intensity data for GC content.

379

380 This study detected 18% of the CNVRs reported in seven other sheep and cattle studies [19, 20, 25,  
381 28, 21-23]. Thirty one percent of the CNVRs that were previously detected in an initial survey of  
382 CNVs in the sheep genome [28] were detected in this study. We were able to identify all of the  
383 CNVRs that were observed in six of the other studies, but only 14% of CNVRs observed in just one  
384 other study. In fact, the more studies a CNVR was detected in, the more likely we were able to  
385 identify the CNVR in our analysis. This trend was also reported by Kijas *et al* [22]. This suggests that  
386 either these CNVRs are less likely to be false positives or they may be more common than the CNVRs  
387 detected in just one study or, alternatively, they may be more likely to occur in both sheep and  
388 cattle. Common CNVRs will be present in more individuals in the population and therefore are more  
389 likely to be observed in the diverse range of animals tested in the different studies. Reasons that this  
390 study was unable to detect many of the CNVs from the other studies include: CNVs that occur in  
391 cattle but not sheep; rare CNVs not seen in our sample of sheep; and false negatives in our study  
392 due in part to the different methods used for CNV detection. Similarly, only a small number (11%) of  
393 CNVRs identified in this study overlapped CNVs detected in these seven other studies. Again, lack of  
394 overlap could be due to the different species or individual animals tested, different methods used  
395 for CNV detection, false negatives in other studies and false positives in our dataset. Confirmation

396 rates varied widely across the studies compared to our results. Variation in confirmation rates from  
397 different studies has also been reported in the literature for human CNV studies [66, 67].

398

## 399 **Conclusions**

400 In this study, comprehensive information from trios, multiple platforms and different algorithms  
401 were used with the aim of verifying CNV segment calls from the Roche-NimbleGen 2.1M CGH array.  
402 CNVs are difficult to verify and as is observed in the literature, a combination of approaches appears  
403 to be the best way to accurately detect CNVs on a large scale. It is likely that comprehensive  
404 sequencing or qPCR would provide clearer information about individual CNV regions and give an  
405 indication of the accuracy of the methods used to detect them. Regardless, characteristics of the  
406 CNV regions detected in this study are comparable to those reported in the literature, and the CNV  
407 regions identified here add to the initial survey of CNVs in the sheep genome by Fontanesi *et al* [28].

408

## 409 **Methods**

### 410 *Roche-NimbleGen 2.1M CGH array - design overview*

411 In total, 2,012,210 probes (50-75 base pairs in length) were distributed evenly on non-repetitive  
412 regions of the UMD3\_OA ovine genome build (an in-house AgResearch comparative sheep genome  
413 assembly, built using cattle reference genome UMD3 [68] and accessible at  
414 [www.sheephapmap.org/CNV/](http://www.sheephapmap.org/CNV/)), with an average spacing of approximately one probe per 1,250 base  
415 pairs (bps) on the autosomes and one probe per 1700bps on chromosome X. In addition to these  
416 probes, a further set of probes was designed around SNPs found on the Illumina OvineSNP50  
417 BeadChip, with the aim of increasing cross platform validation between the 2.1M CGH array and  
418 OvineSNP50 BeadChip. This involved mapping SNPs and flanking sequence onto UMD3\_OA. In  
419 some instances, SNP sequences did not map uniquely to the genome, with multiple hits on the same



420 chromosome, suggesting the possibility that multiple copies of the sequence could occur in adjacent  
421 duplicated regions (e.g. CNV). As these SNPs may have been in CNV regions, these regions were also  
422 used for specific probe design and inclusion on the array. Probes were also designed on  
423 chromosome unknown scaffolds. Chromosome unknown scaffolds represent sequence data that  
424 cannot be placed on the genome assembly.

425

426 *Roche-NimbleGen 2.1M CGH array design - targeted probe design around OvineSNP50 BeadChip*  
427 *SNPs*

428 In total, 28,754 out of 50,064 SNP sequences (either the 50bp OvineSNP50 BeadChip probe or 300bp  
429 flanking the SNP) successfully mapped to UMD3\_OA (BLAST parameters -U T -F "m D" -e 1e-5, Korf *et*  
430 *al* [69]) and met the requirement of having three probes designed to cover them, as selected by one  
431 of the following two methods (Figure 4). The first involved designing a probe to cover the SNP base  
432 pair position. Flanking probes were designed within 400bp windows 100bp up- or down-stream of  
433 the SNP region, where the SNP region consisted of 300bps flanking the SNP position. If three probes  
434 were not obtained with this method, then a second method was used. This involved selecting a  
435 probe in the SNP region without requiring the probe to cover the SNP position, with flanking probes  
436 selected from 400bp windows 100bp up- or down-stream of the SNP region (Figure 4). In total,  
437 86,262 probes were designed within or adjacent to 28,754 SNP regions.

438 Of the 21,310 SNP sequences that could not be mapped to UMD3\_OA, 240 were mapped by relaxing  
439 the BLAST parameters to -W 11 -q -1 -r 1 -s 0 -F "m D" -U T -X 40 [69]. A total of 634 probes were  
440 designed to cover 218 of these SNP regions.

441 A subset of 401 SNP sequences mapped to UMD3\_OA, but not uniquely - with two top hits on the  
442 same chromosome. In total, 879 probes covering 323 of these positions were designed for inclusion  
443 on the 2.1M CGH array.

444

445 *Roche-NimbleGen 2.1M CGH array design – chromosome unknown*

446 Chromosome unknown sequences (n=492) were merged into a virtual chromosome,  
447 UMD3\_chrU\_OA, with each sequence separated by 100 N's. Probes were distributed at an average  
448 spacing of approximately one every 1,600bps on this chromosome.

449

450 *Roche-NimbleGen 2.1M CGH array – animals assayed*

451 Genomic DNA was extracted from blood samples of 36 animals (Supplementary Table 1), which were  
452 assayed on the 2.1M CGH array. Thirty animals were from the International Mapping Flock (IMF)  
453 and consisted of families of trios (Figure 5). The IMF animals are crossbreds of up to five different  
454 breeds – Texel, Coopworth, Perendale, Romney and Merino [45]. In addition to the IMF animals, six  
455 sheep, sequenced to approximately 10X coverage each, were also assayed on the 2.1M CGH array.  
456 These six animals were - Awassi, Merino, Poll Dorset, Romney, Scottish Blackface and Texel  
457 purebreds. The Poll Dorset was used as the reference animal for all 2.1M CGH array hybridisations  
458 and was also run against itself in a self-self hybridisation to allow characterisation of false positive  
459 calls [70, 23].

460

461 *Roche-NimbleGen 2.1M CGH array – segMNT output processing*

462 CNV segments were called in the assayed animals by Roche-NimbleGen using their proprietary  
463 segMNT algorithm. This software reports the average  $\log_2$  ratio of a segment (the binary logarithm of  
464 the average of the intensity of the test animals probes in a segment call divided by the average of  
465 the intensity of the reference animals probes in the same region), the number of datapoints (probes)  
466 included in the segment and the length of the segment in base pairs.

467 The variance of normalised  $\log_2$  ratio values over all probes for each animal was obtained. Five  
468 animals were deleted from the analysis as their  $\log_2$  ratio data exhibited larger variation than  
469 observed in other animals, meaning that they were deemed to be failed CGH hybridisations.

470 Segment calls with absolute  $\log_2$  ratios less than 0.1 were removed from the analysis [7].

471

#### 472 *Validating Roche-NimbleGen 2.1M CGH array segment calls*

473 IMF trios were used to validate segment calls. If a progeny segment call was seen in at least one  
474 parent at an identical genomic location (same first and last probe included in the segment call and  
475 therefore same genomic start and stop position), the progeny call was considered validated. These  
476 calls were deemed to represent “true CNVs” for model building.

#### 477 *Model used to predict CNVs in the wider dataset and downstream filtering*

478 For model building, validated progeny calls were deemed to represent true CNVs and self-self  
479 hybridisations were deemed to be false positives. Only autosomal segment calls were used. Forward  
480 stepwise logistic regression was used to construct a model, with a binary outcome variable 0 (self-  
481 self) or 1 (validated trio segment call). Variables used for model building were: absolute  $\log_2$  ratio  
482 ( $absl2r$ ); whether the call was a deletion or duplication; length, in bps;  $\ln(\text{length})$ ;  $\ln(\ln(\text{length}))$ ;  
483 length-squared; number of probes in segment call, datapoints;  $\ln(\text{datapoints})$ ;  $\ln(\ln(\text{datapoints}))$ ;  
484 datapoints-squared; and corresponding two- and three-way interactions. If the Wald chi-square  
485 statistic for a variable was significant at the 0.3 level it was added to the model. A variable remained  
486 in the model if it was significant at the 0.35 level.

487

488 The crossvalidate procedure in SAS software (*SAS version 9.1*) was used to test model performance.

489 This procedure omits one segment call in turn and re-calculates model coefficients based on all  
490 other segment calls per iteration. It then predicts the probability the omitted call represents a true

491 CNV. Threshold values were applied to categorise calls as true or false based on their probabilities –  
492 true or false. Probability thresholds tested were 0.5, 0.6, 0.7, 0.8, 0.9, 0.95, 0.96, 0.97, 0.98 and 0.99.  
493 For each probability threshold tested, the number of times the procedure correctly predicted the  
494 known segment call status (true or false) was used as a measure of model accuracy. The final  
495 probability threshold used was 0.95.

496

497 The final model selected was,

$$\ln\left(\frac{p}{(1-p)}\right) = -0.19 + 29.51\text{absl}2r - 4.91(\ln(\ln(\text{length}))) + 8.24(\ln(\ln(\text{datapoints})))$$

498 This model was applied to all segment calls not used in model development. Segment calls equal to  
499 or greater than the probability threshold of 0.95 were retained. The dataset was further filtered to  
500 include only CNVs  $\geq 1$  kbp in length (so that they conformed to the definition of a CNV, as per [2],  
501 only CNVs with  $\geq 3$  probes in the corresponding segment call and with absolute  $\log_2$  ratio  $\geq 0.25$ .  
502 These filtered segment calls were deemed to represent true CNVs.

503

504 Segment calls on chromosome X were processed through the model and filtered as above. Filtered  
505 CNVs on chromosome X were considered to represent true CNVs for female individuals. Duplications  
506 on chromosome X in males were considered to represent true CNVs. Deletions on chromosome X in  
507 males were assumed to be inconclusive as they could be due to differences in the number of X  
508 chromosomes between the male test animal and the female reference animal.

509

510 Segment calls on the virtual chromosome UMD3\_chrU\_OA were processed differently to segment  
511 calls on the autosomes and chromosome X. Chromosome unknown sequences were collated into  
512 larger virtual chromosomes, UMD3\_chrU\_OA, with each sequence separated by 100 N's. Segment  
513 calls on this virtual chromosome were discarded if they spanned more than one chromosome  
514 unknown sequence or if all probes on one chromosome unknown sequence were included in the  
515 segment call. The reason for excluding segment calls where all probes on the chromosome unknown

516 sequence were included in the call was because there was no way to compare the call to nearby  
517 sequence to determine if the  $\log_2$  ratio was different to other stretches of DNA in the region. There  
518 were two Poll Dorset (self-self hybridisation) segment calls on UMD3\_chrU\_OA. The  $\log_2$  ratios of  
519 these calls were -0.32 and -0.17. Thus calls with absolute  $\log_2$  ratios  $\leq 0.32$  were removed from the  
520 analysis. Segment calls that met these criteria and that contained at least two probes, while  
521 excluding at least two probes from the corresponding chromosome unknown sequence, were  
522 retained.

523

#### 524 *CNV regions*

525 Across all animals, autosomal and chromosome X CNVs within 1,500bps of one another were  
526 collapsed into CNV regions (CNVRs).

527

528 To determine if CNVRs were uniformly distributed in the genome, a simulated dataset of CNVRs was  
529 generated by randomly sampling genomic positions of the identified autosomal CNVRs from a  
530 uniform distribution. Spacing was constrained so that CNVRs could not be within 1,500bps of each  
531 other. The simulated dataset provided an expected distribution of CNVRs in the genome and  
532 corresponding pairwise distances between CNVRs. A Kolmogorov-Smirnov test was performed to  
533 determine if the distribution of pairwise distances between CNVRs in the observed dataset was  
534 significantly different from that seen in the simulated dataset.

535

#### 536 *Verifying CNVRs across platforms*

537 Three other platforms were used for CNV identification – Roche-NimbleGen 385K CGH array,  
538 OvineSNP50 BeadChip, and Illumina HiSeq 2000 sequence data analysis, with each based on a  
539 different version of the ovine genome. To perform cross platform validation autosomal CNVRs

540 identified on the Roche-NimbleGen 2.1M CGH array were mapped to genomes BTA\_OARv.2 (for use  
541 with the 385K CGH array), OARv1 (for use with the OvineSNP50 BeadChip) and OARv3 (for use with  
542 sequence data analysis). CNVR sequence and 1,750bps flanking the start and stop of each CNVR  
543 were obtained. Sequences were masked with an ovine repeat database isgcandrebase2  
544 (Supplementary file 1) and BLASTed against each genome, with parameters -F 'm D' -U T -Z 2000  
545 [69]. CNVR start and stop positions on each genome were approximated based on the BLAST  
546 alignment. When the predicted CNVR start position was a negative number, it was set to one (i.e.  
547 the first base pair of the chromosome).

548

549 The Roche-NimbleGen 385K CGH array is based on the same technology as the Roche-NimbleGen  
550 2.1M CGH array; however, it has fewer probes covering the genome, with a probe density of  
551 approximately 1 probe per 6,000bps. Twenty animals were run on the 385K CGH array, including  
552 five animals (Awassi, Merino, Romney, Scottish blackface and Texel) that were run on the 2.1M CGH  
553 array. The Poll Dorset was used as a reference on the 385K CGH array and the 2.1M CGH array.  
554 Autosomal CNVRs identified using the 2.1M CGH array were positioned on BTA\_OARv.2 as described  
555 above. CNVRs positioned on BTA\_OARv.2 autosomes were retained for cross platform verification.  
556 CNV segments called by the NimbleGen segMNT software in the 385K CGH dataset were processed  
557 to include only autosomal segments with absolute  $\log_2$  ratios  $\geq 0.25$ . Autosomal CNVRs in the five  
558 animals were considered verified if there was overlap between their processed 385K CGH segment  
559 calls and their 2.1M CGH array CNVR calls mapped to BTA\_OARv.2. This comparison was performed  
560 separately for each animal.

561

562 Twenty IMF and five sequenced animals had previously been genotyped on the OvineSNP50  
563 BeadChip. SNP genotypes for these animals were run through the cnvPartition (Illumina Inc., USA)  
564 and DNACopy [47] algorithms. DNACopy results were filtered to include only calls with absolute  $\log_2$   
565 ratios  $\geq 0.25$ . Autosomal CNVRs identified with the 2.1M CGH array and successfully mapped to

566 OARv1 autosomes were considered verified if they overlapped autosomal CNVs predicted by  
567 cnvPartition or DNACopy, in the same animal.

568

569 Six animals assayed on the 2.1M CGH array were each sequenced to between 9.8X and 14X coverage  
570 by paired-end sequencing on the Illumina HiSeq 2000 platform at Baylor College of Medicine (NCBI  
571 short read archive accessions SRX150284, SRX150292, SRX150299, SRX150330, SRX150341,  
572 SRX150350). The following analysis was carried out separately for each animal. Sequence reads  
573 were positioned on ovine genome OARv3 using the Burrows-Wheeler Alignment (BWA) algorithm  
574 [71] and pileup files [72] were used to retrieve read depth information at each base pair position on  
575 the autosomes. Reads were portioned into 1kbp overlapping bins, excluding repetitive sequence,  
576 using a sliding window of 200bps. Masked repetitive sequence positions were translated to genome  
577 build OARv3. As well as excluding repetitive sequence, for each chromosome a maximum read depth  
578 was set per chromosome to exclude potentially unmasked repeats from the CNV sequence analysis.  
579 The maximum read depth threshold was set based on inspection of the read depth distribution  
580 function with the aim of excluding outliers in read depth data. Bins with a maximum read depth  
581 exceeding the threshold were deleted from the analysis. The average read depth over all base pairs  
582 was determined for each bin after correcting for GC content based on methods presented by Yoon  
583 *et al* [73].

584

585 Pseudo-Maximum likelihood was used to fit a mixture model to determine if the average read depth  
586 for each bin represented a homozygous deletion (copy number, CN=0), heterozygous deletion  
587 (CN=1), normal diploid copy number (2), heterozygous duplication (3) or homozygous duplication (4)  
588 in the genome. The mixture model used (Table 4) was a mixture of four normal distributions (for  
589 modeling CN = 1 to 4) and one half-normal distribution (for CN = 0). Constraints were placed on the  
590 parameters of the normal distributions so that the means and variances of the distributions

591 corresponding to CN =1, 3 and 4 were equal to respectively 1/2, 3/2 and 2 times the mean and  
592 variance of the distribution corresponding to CN = 2. Model fitting was done on a per chromosome  
593 basis, using the R function *nlimb* [74]. Specifically, seven parameters were estimated for each  
594 chromosome:  $\mu_2$  and  $\sigma_2^2$ , the mean and variance of read depth for a bin corresponding to CN = 2 (the  
595 “normal” diploid copy number);  $\sigma_0^2$ , the variance of read depth for a bin corresponding to CN = 0  
596 (homozygous deletion) and four of the five mixture weights (prior probability of a bin falling into  
597 each of the five distributions). Where these parameters could not be estimated for a chromosome,  
598 average estimates based on all other chromosomes for a given animal were used. Table 5 details the  
599 starting values and lower and upper bounds used by *nlimb* for each parameter. Based on those  
600 parameter estimates, each bin was assigned to one of the five CNV classes by multiplying the values  
601 of each of the five probability density functions for each bin by the corresponding mixture weights  
602 (i.e., calculating the posterior probability of a bin being in each of the distributions) and selecting the  
603 CNV class with the highest value. For each of the six animals, bins in regions corresponding to  
604 autosomal CNVRs identified on the 2.1M CGH array and mapped to OARv3 autosomes were used to  
605 determine if the CNVR was verified in the sequence data. Specifically, if at least one bin was  
606 observed as representing a CNV then the CNVR was considered to be verified. In instances where  
607 there was conflict between results from the sequence analysis and the 2.1M CGH array, individual  
608 animal data were compared to the reference (Poll Dorset) animal. This animal was used as the  
609 reference animal in the 2.1M CGH array experiments and therefore results for individual animals  
610 may be influenced by the corresponding copy number present in the Poll Dorset.

#### 611 *Comparison of CNVRs to those identified in the literature*

612 CNVR sequences were masked against AgResearch ovine repeat database isgcandrepbase2 and  
613 BLASTed against btau\_4.0 using BLAST parameters -F 'm D' -U T -Z 2000 [69] to obtain their positions  
614 on the genome. Genomic positions on btau\_4.0 of CNVs identified from seven other sheep and  
615 cattle studies [28, 21-23, 25, 19, 20] were obtained. An overlap of 1bp or more between autosomal



616 CNVRs identified in this study and these seven other studies was used to give an indication as to how  
617 many CNVs from other studies we were able to detect and how many of the CNVs detected in this  
618 study were also reported in the other studies.

#### 619 *Overlap between autosomal CNVRs and genes*

620 CNVR sequences were masked (isgcarepbase2) and BLASTed (parameters -F 'm D' -U T -Z 2000)  
621 against OARv3 to obtain their positions on the genome. Positions of the coding sequence of genes  
622 on OARv3 were provided by BGI (personal communication, Rudiger Brauning). Overlap between  
623 autosomal CNVRs and the coding sequence of genes were determined. CNVRs that overlapped gene  
624 coding sequences by 1bp or more were used to derive the proportion of CNVRs overlapping genes.  
625 Overlap with the agouti signalling protein and adenosylhomocysteinase genes were used as a  
626 positive control, as this locus is observed as duplicated in the sheep genome [27].

627

628 A Monte Carlo simulation was set up to randomly distribute the CNVRs throughout the sheep  
629 genome and to create a distribution of the expected proportion of deletion CNVRs and duplication  
630 CNVRs overlapping genes (by at least 1bp). One hundred iterations were run to generate 100  
631 expected proportions for both duplications and deletions. For both duplication and deletion CNVRs,  
632 the observed proportion was ranked along with the 100 simulated proportions and a two-tailed  
633 empirical p-value was calculated.

#### 634 **Declarations**

#### 635 **List of abbreviations**

636 Absl2r - absolute log<sub>2</sub> ratio

637 bps - base pairs

638 BWA - Burrows-Wheeler Alignment

639 CGH - comparative genomic hybridisation

640 CNV - Copy number variants

641 CNVR - CNV regions

642 IMF - International Mapping Flock

643 indels - INsertions/DELetions

644 ISGC - International Sheep Genomics Consortium

645 Kb - kilobase

646 Mb - megabase

647 Oligo aCGH - oligonucleotide CGH array

648 QTL - quantitative trait loci

649 SD - segmental duplications

650 SLE - systemic lupus erythematosus

651

## 652 **Ethics**

653 This study was carried out in strict accordance of the guidelines of the 1999 New Zealand Animal

654 Welfare Act and was approved by the AgResearch's Invermay, Animal Ethics committee (applications

655 AE154 and AE10879).

## 656 **Availability of data and materials**

657 The UMD3\_OA ovine genome build (an in-house AgResearch comparative sheep genome assembly,

658 built using cattle reference genome UMD3 is accessible at [www.sheephapmap.org/CNV/](http://www.sheephapmap.org/CNV/). Whole

659 genome resequencing files are deposited in the NCBI short read archives (accessions [SRX150284](https://.ncbi.nlm.nih.gov/short-reads/SRX150284),

660 [SRX150292](https://.ncbi.nlm.nih.gov/short-reads/SRX150292), [SRX150299](https://.ncbi.nlm.nih.gov/short-reads/SRX150299), [SRX150330](https://.ncbi.nlm.nih.gov/short-reads/SRX150330), [SRX150341](https://.ncbi.nlm.nih.gov/short-reads/SRX150341), [SRX150350](https://.ncbi.nlm.nih.gov/short-reads/SRX150350)). The raw and SEGMENT processed HD

661 aCGH data are deposited in figshare <https://dx.doi.org/10.6084/m9.figshare.3007282> along with a  
662 description file.

### 663 **Competing interests**

664 The authors declare that they have no competing interests.

### 665 **Funding**

666 The authors wish to acknowledge the financial contribution made by Ovita Limited and USDA grant  
667 AFRI 2009-03305 for providing funding for a large part of this work.

### 668 **Authors' contributions**

669 GMJ carried out the research and wrote the manuscript. MEG, MAB and JCM participated in study  
670 design, provided input on analysis and revised the manuscript. JWK provided access to data and  
671 revised the manuscript. KGD consulted on statistical analysis. BA was involved in sequence analysis.  
672 RB carried out and advised on bioinformatic processes and was involved in the design of the Roche  
673 NimbleGen 2.1M CGH array. NC revised the manuscript. All authors read and approved the final  
674 manuscript.

### 675 **Acknowledgments**

676 The authors also wish to acknowledge the International Sheep Genomics Consortium for access to  
677 sheep samples, whole genome sequence from these samples and early access to genome  
678 assemblies.

679

### 680 **References**

681 1. Stranger BE, Forrest MS, Dunning M, Ingle CE, Beazley C, Thorne N et al. Relative impact of  
682 nucleotide and copy number variation on gene expression phenotypes. *Science*.  
683 2007;315(5813):848-53. doi:315/5813/848 [pii]  
684 10.1126/science.1136678.

- 685 2. Feuk L, Carson AR, Scherer SW. Structural variation in the human genome. *Nat Rev Genet.*  
686 2006;7(2):85-97. doi:[http://www.nature.com/nrg/journal/v7/n2/supinfo/nrg1767\\_S1.html](http://www.nature.com/nrg/journal/v7/n2/supinfo/nrg1767_S1.html).
- 687 3. Egan CM, Sridhar S, Wigler M, Hall IM. Recurrent DNA copy number variation in the laboratory  
688 mouse. *Nat Genet.* 2007;39(11):1384-9. doi:10.1038/ng.2007.19.
- 689 4. Abecasis GR, Altshuler D, Auton A, Brooks LD, Durbin RM, Gibbs RA et al. A map of human genome  
690 variation from population-scale sequencing. *Nature.* 2010;467(7319):1061-73. doi:nature09534 [pii]  
691 10.1038/nature09534.
- 692 5. Michaelson Jacob J, Shi Y, Gujral M, Zheng H, Malhotra D, Jin X et al. Whole-Genome Sequencing  
693 in Autism Identifies Hot Spots for De Novo Germline Mutation. *Cell.* 2012;151(7):1431-42.  
694 doi:<http://dx.doi.org/10.1016/j.cell.2012.11.019>.
- 695 6. Stankiewicz P, Lupski JR. Structural variation in the human genome and its role in disease. *Annu*  
696 *Rev Med.* 2010;61:437-55. doi:10.1146/annurev-med-100708-204735.
- 697 7. Conrad DF, Pinto D, Redon R, Feuk L, Gokcumen O, Zhang Y et al. Origins and functional impact of  
698 copy number variation in the human genome. *Nature.* 2010;464(7289):704-12.  
699 doi:[http://www.nature.com/nature/journal/v464/n7289/supinfo/nature08516\\_S1.html](http://www.nature.com/nature/journal/v464/n7289/supinfo/nature08516_S1.html).
- 700 8. Pang A, MacDonald J, Pinto D, Wei J, Rafiq M, Conrad D et al. Towards a comprehensive structural  
701 variation map of an individual human genome. *Genome Biology.* 2010;11(5):R52.
- 702 9. Kim PM, Lam HYK, Urban AE, Korbel JO, Affourtit J, Grubert F et al. Analysis of copy number  
703 variants and segmental duplications in the human genome: Evidence for a change in the process of  
704 formation in recent evolutionary history. *Genome Res.* 2008;18(12):1865-74.  
705 doi:10.1101/gr.081422.108.
- 706 10. Long J, Delahanty RJ, Li G, Gao YT, Lu W, Cai Q et al. A Common Deletion in the APOBEC3 Genes  
707 and Breast Cancer Risk. *J Natl Cancer Inst.* 2013;105(8):573-9. doi:djt018 [pii]  
708 10.1093/jnci/djt018.
- 709 11. Yang L, Liu B, Huang B, Deng J, Li H, Yu B et al. A functional copy number variation in the WWOX  
710 gene is associated with lung cancer risk in Chinese. *Hum Mol Genet.* 2013;22(9):1886-94. doi:ddt019  
711 [pii]  
712 10.1093/hmg/ddt019.
- 713 12. Suehiro Y, Okada T, Shikamoto N, Zhan Y, Sakai K, Okayama N et al. Germline copy number  
714 variations associated with breast cancer susceptibility in a Japanese population. *Tumour Biol.*  
715 2012;34(2):947-52. doi:10.1007/s13277-012-0630-x.
- 716 13. Fanciulli M, Norsworthy PJ, Petretto E, Dong R, Harper L, Kamesh L et al. FCGR3B copy number  
717 variation is associated with susceptibility to systemic, but not organ-specific, autoimmunity. *Nat*  
718 *Genet.* 2007;39(6):721-3. doi:ng2046 [pii]  
719 10.1038/ng2046.
- 720 14. Gonzalez E, Kulkarni H, Bolivar H, Mangano A, Sanchez R, Catano G et al. The influence of CCL3L1  
721 gene-containing segmental duplications on HIV-1/AIDS susceptibility. *Science.* 2005;307(5714):1434-  
722 40. doi:1101160 [pii]  
723 10.1126/science.1101160.
- 724 15. Salmon Hillbertz NH, Isaksson M, Karlsson EK, Hellmen E, Pielberg GR, Savolainen P et al.  
725 Duplication of FGF3, FGF4, FGF19 and ORAOV1 causes hair ridge and predisposition to dermoid sinus  
726 in Ridgeback dogs. *Nat Genet.* 2007;39(11):1318-20. doi:ng.2007.4 [pii]  
727 10.1038/ng.2007.4.
- 728 16. Wright D, Boije H, Meadows JR, Bed'hom B, Gourichon D, Vieaud A et al. Copy number variation  
729 in intron 1 of SOX5 causes the Pea-comb phenotype in chickens. *PLoS Genet.* 2009;5(6):e1000512.  
730 doi:10.1371/journal.pgen.1000512.

- 731 17. Chen C, Qiao R, Wei R, Guo Y, Ai H, Ma J et al. A comprehensive survey of copy number variation  
732 in 18 diverse pig populations and identification of candidate copy number variable genes associated  
733 with complex traits. *BMC Genomics*. 2012;13:733. doi:1471-2164-13-733 [pii]  
734 10.1186/1471-2164-13-733.
- 735 18. Johansson Moller M, Chaudhary R, Hellmen E, Hoyheim B, Chowdhary B, Andersson L. Pigs with  
736 the dominant white coat color phenotype carry a duplication of the KIT gene encoding the  
737 mast/stem cell growth factor receptor. *Mamm Genome*. 1996;7(11):822-30.
- 738 19. Bae J, Cheong H, Kim L, NamGung S, Park T, Chun J-Y et al. Identification of copy number  
739 variations and common deletion polymorphisms in cattle. *BMC Genomics*. 2010;11(1):232.
- 740 20. Bickhart DM, Hou Y, Schroeder SG, Alkan C, Cardone MF, Matukumalli LK et al. Copy number  
741 variation of individual cattle genomes using next-generation sequencing. *Genome Res*.  
742 2012;22(4):778-90. doi:10.1101/gr.133967.111.
- 743 21. Hou Y, Liu GE, Bickhart DM, Cardone MF, Wang K, Kim ES et al. Genomic characteristics of cattle  
744 copy number variations. *BMC Genomics*. 2011;12:127. doi:1471-2164-12-127 [pii]  
745 10.1186/1471-2164-12-127.
- 746 22. Kijas JW, Barendse W, Barris W, Harrison B, McCulloch R, McWilliam S et al. Analysis of copy  
747 number variants in the cattle genome. *Gene*. 2011;482(1-2):73-7. doi:S0378-1119(11)00179-X [pii]  
748 10.1016/j.gene.2011.04.011.
- 749 23. Liu GE, Hou Y, Zhu B, Cardone MF, Jiang L, Cellamare A et al. Analysis of copy number variations  
750 among diverse cattle breeds. *Genome Res*. 2010;20(5):693-703. doi:10.1101/gr.105403.110.
- 751 24. Cicconardi F, Chillemi G, Tramontano A, Marchitelli C, Valentini A, Ajmone-Marsan P et al.  
752 Massive screening of copy number population-scale variation in *Bos taurus* genome. *BMC Genomics*.  
753 2013;14(1):124. doi:1471-2164-14-124 [pii]  
754 10.1186/1471-2164-14-124.
- 755 25. Fadista J, Thomsen B, Holm LE, Bendixen C. Copy number variation in the bovine genome. *BMC*  
756 *Genomics*. 2010;11:284. doi:1471-2164-11-284 [pii]  
757 10.1186/1471-2164-11-284.
- 758 26. Jiang L, Jiang J, Yang J, Liu X, Wang J, Wang H et al. Genome-wide detection of copy number  
759 variations using high-density SNP genotyping platforms in Holsteins. *BMC Genomics*. 2013;14(1):131.  
760 doi:1471-2164-14-131 [pii]  
761 10.1186/1471-2164-14-131.
- 762 27. Norris BJ, Whan VA. A gene duplication affecting expression of the ovine ASIP gene is responsible  
763 for white and black sheep. *Genome Res*. 2008;18(8):1282-93. doi:gr.072090.107 [pii]  
764 10.1101/gr.072090.107.
- 765 28. Fontanesi L, Beretti F, Martelli PL, Colombo M, Dall'Olio S, Occidente M et al. A first comparative  
766 map of copy number variations in the sheep genome. *Genomics*. 2011;97(3):158-65.  
767 doi:10.1016/j.ygeno.2010.11.005.
- 768 29. Barrett MT, Scheffer A, Ben-Dor A, Sampas N, Lipson D, Kincaid R et al. Comparative genomic  
769 hybridization using oligonucleotide microarrays and total genomic DNA. *Proc Natl Acad Sci U S A*.  
770 2004;101(51):17765-70. doi:0407979101 [pii]  
771 10.1073/pnas.0407979101.
- 772 30. Graubert TA, Cahan P, Edwin D, Selzer RR, Richmond TA, Eis PS et al. A high-resolution map of  
773 segmental DNA copy number variation in the mouse genome. *PLoS Genet*. 2007;3(1):e3. doi:06-  
774 PLGE-RA-0282R3 [pii]  
775 10.1371/journal.pgen.0030003.

- 776 31. Kallioniemi A, Kallioniemi OP, Sudar D, Rutovitz D, Gray JW, Waldman F et al. Comparative  
777 genomic hybridization for molecular cytogenetic analysis of solid tumors. *Science*.  
778 1992;258(5083):818-21.
- 779 32. Pinkel D, Seagraves R, Sudar D, Clark S, Poole I, Kowbel D et al. High resolution analysis of DNA  
780 copy number variation using comparative genomic hybridization to microarrays. *Nat Genet*.  
781 1998;20(2):207-11.
- 782 33. Yu H, Chao J, Patek D, Mujumdar R, Mujumdar S, Waggoner AS. Cyanine dye dUTP analogs for  
783 enzymatic labeling of DNA probes. *Nucleic Acids Res*. 1994;22(15):3226-32.
- 784 34. Jeon JP, Shim SM, Jung JS, Nam HY, Lee HJ, Oh BS et al. A comprehensive profile of DNA copy  
785 number variations in a Korean population: identification of copy number invariant regions among  
786 Koreans. *Exp Mol Med*. 2009;41(9):618-28. doi:10.3858/emm.2009.41.9.068.
- 787 35. Kidd JM, Cooper GM, Donahue WF, Hayden HS, Sampas N, Graves T et al. Mapping and  
788 sequencing of structural variation from eight human genomes. *Nature*. 2008;453(7191):56-64.  
789 doi:[http://www.nature.com/nature/journal/v453/n7191/supinfo/nature06862\\_S1.html](http://www.nature.com/nature/journal/v453/n7191/supinfo/nature06862_S1.html).
- 790 36. McCarroll SA, Hadnott TN, Perry GH, Sabeti PC, Zody MC, Barrett JC et al. Common deletion  
791 polymorphisms in the human genome. *Nat Genet*. 2006;38(1):86-92.
- 792 37. Redon R, Ishikawa S, Fitch KR, Feuk L, Perry GH, Andrews TD et al. Global variation in copy  
793 number in the human genome. *Nature*. 2006;444(7118):444-54.  
794 doi:[http://www.nature.com/nature/journal/v444/n7118/supinfo/nature05329\\_S1.html](http://www.nature.com/nature/journal/v444/n7118/supinfo/nature05329_S1.html).
- 795 38. Abyzov A, Urban AE, Snyder M, Gerstein M. CNVnator: an approach to discover, genotype, and  
796 characterize typical and atypical CNVs from family and population genome sequencing. *Genome Res*.  
797 2011;21(6):974-84. doi:gr.114876.110 [pii]  
798 10.1101/gr.114876.110.
- 799 39. Teo SM, Pawitan Y, Ku CS, Chia KS, Salim A. Statistical challenges associated with detecting copy  
800 number variations with next-generation sequencing. *Bioinformatics*. 2012;28(21):2711-8.  
801 doi:10.1093/bioinformatics/bts535.
- 802 40. Xi R, Hadjipanayis AG, Luquette LJ, Kim TM, Lee E, Zhang J et al. Copy number variation detection  
803 in whole-genome sequencing data using the Bayesian information criterion. *Proc Natl Acad Sci U S A*.  
804 2011;108(46):E1128-36. doi:1110574108 [pii]  
805 10.1073/pnas.1110574108.
- 806 41. Xi R, Lee S, Park PJ. A survey of copy-number variation detection tools based on high-throughput  
807 sequencing data. *Curr Protoc Hum Genet*. 2012;Chapter 7:Unit7 19.  
808 doi:10.1002/0471142905.hg0719s75.
- 809 42. Ye K, Schulz MH, Long Q, Apweiler R, Ning Z. Pindel: a pattern growth approach to detect break  
810 points of large deletions and medium sized insertions from paired-end short reads. *Bioinformatics*.  
811 2009;25(21):2865-71. doi:btp394 [pii]  
812 10.1093/bioinformatics/btp394.
- 813 43. Savarese M, Piluso G, Orteschi D, Di Fruscio G, Dionisi M, Blanco FdV et al. Enhancer Chip:  
814 Detecting Human Copy Number Variations in Regulatory Elements. *PLoS ONE*. 2012;7(12):e52264.  
815 doi:10.1371/journal.pone.0052264.
- 816 44. Krumm N, Sudmant PH, Ko A, O'Roak BJ, Malig M, Coe BP et al. Copy number variation detection  
817 and genotyping from exome sequence data. *Genome Res*. 2012;22(8):1525-32.  
818 doi:10.1101/gr.138115.112.
- 819 45. Crawford AM, Dodds KG, Ede AJ, Pierson CA, Montgomery GW, Garmonsway HG et al. An  
820 autosomal genetic linkage map of the sheep genome. *Genetics*. 1995;140(2):703-24.
- 821 46. Freeman JL, Perry GH, Feuk L, Redon R, McCarroll SA, Altshuler DM et al. Copy number variation:  
822 new insights in genome diversity. *Genome Res*. 2006;16(8):949-61. doi:gr.3677206 [pii]  
823 10.1101/gr.3677206.

- 824 47. Olshen AB, Venkatraman ES, Lucito R, Wigler M. Circular binary segmentation for the analysis of  
825 array-based DNA copy number data. *Biostatistics*. 2004;5(4):557-72.  
826 doi:10.1093/biostatistics/kxh008.
- 827 48. McCarroll SA, Kuruvilla FG, Korn JM, Cawley S, Nemesh J, Wysoker A et al. Integrated detection  
828 and population-genetic analysis of SNPs and copy number variation. *Nat Genet*. 2008;40(10):1166-  
829 74. doi:ng.238 [pii]  
830 10.1038/ng.238.
- 831 49. Craddock N, Hurler ME, Cardin N, Pearson RD, Plagnol V, Robson S et al. Genome-wide  
832 association study of CNVs in 16,000 cases of eight common diseases and 3,000 shared controls.  
833 *Nature*. 2010;464(7289):713-20. doi:nature08979 [pii]  
834 10.1038/nature08979.
- 835 50. Li Y, Mei S, Zhang X, Peng X, Liu G, Tao H et al. Identification of genome-wide copy number  
836 variations among diverse pig breeds by array CGH. *BMC Genomics*. 2012;13:725. doi:1471-2164-13-  
837 725 [pii]  
838 10.1186/1471-2164-13-725.
- 839 51. Berglund J, Nevalainen E, Molin A-M, Perloski M, Consortium TL, Andre C et al. Novel origins of  
840 copy number variation in the dog genome. *Genome Biology*. 2012;13(8):R73.
- 841 52. She X, Cheng Z, Zollner S, Church DM, Eichler EE. Mouse segmental duplication and copy number  
842 variation. *Nat Genet*. 2008;40(7):909-14.  
843 doi:[http://www.nature.com/ng/journal/v40/n7/supinfo/ng.172\\_S1.html](http://www.nature.com/ng/journal/v40/n7/supinfo/ng.172_S1.html).
- 844 53. Cooper GM, Nickerson DA, Eichler EE. Mutational and selective effects on copy-number variants  
845 in the human genome. *Nat Genet*. 2007;39(7 Suppl):S22-9. doi:ng2054 [pii]  
846 10.1038/ng2054.
- 847 54. Stankiewicz P, Lupski JR. Genome architecture, rearrangements and genomic disorders. *Trends*  
848 *Genet*. 2002;18(2):74-82. doi:S0168-9525(02)02592-1 [pii].
- 849 55. Zhang F, Gu W, Hurler ME, Lupski JR. Copy number variation in human health, disease, and  
850 evolution. *Annu Rev Genomics Hum Genet*. 2009;10:451-81.  
851 doi:10.1146/annurev.genom.9.081307.164217.
- 852 56. Conrad DF, Andrews TD, Carter NP, Hurler ME, Pritchard JK. A high-resolution survey of deletion  
853 polymorphism in the human genome. *Nat Genet*. 2006;38(1):75-81. doi:ng1697 [pii]  
854 10.1038/ng1697.
- 855 57. Emerson JJ, Cardoso-Moreira M, Borevitz JO, Long M. Natural Selection Shapes Genome-Wide  
856 Patterns of Copy-Number Polymorphism in *Drosophila melanogaster*. *Science*. 2008;320(5883):1629-  
857 31. doi:10.1126/science.1158078.
- 858 58. Jurka J, Kohany O, Pavlicek A, Kapitonov VV, Jurka MV. Duplication, coclustering, and selection of  
859 human Alu retrotransposons. *Proceedings of the National Academy of Sciences of the United States*  
860 *of America*. 2004;101(5):1268-72. doi:10.1073/pnas.0308084100.
- 861 59. Cooper GM, Zerr T, Kidd JM, Eichler EE, Nickerson DA. Systematic assessment of copy number  
862 variant detection via genome-wide SNP genotyping. *Nat Genet*. 2008;40(10):1199-203. doi:ng.236  
863 [pii]  
864 10.1038/ng.236.
- 865 60. Locke DP, Sharp AJ, McCarroll SA, McGrath SD, Newman TL, Cheng Z et al. Linkage disequilibrium  
866 and heritability of copy-number polymorphisms within duplicated regions of the human genome.  
867 *Am J Hum Genet*. 2006;79(2):275-90. doi:S0002-9297(07)63135-8 [pii]  
868 10.1086/505653.
- 869 61. Cooper DN, Bacolla A, Férec C, Vasquez KM, Kehrer-Sawatzki H, Chen J-M. On the sequence-  
870 directed nature of human gene mutation: The role of genomic architecture and the local DNA

- 871 sequence environment in mediating gene mutations underlying human inherited disease. *Hum*  
872 *Mutat.* 2011;32(10):1075-99. doi:10.1002/humu.21557.
- 873 62. Nguyen DQ, Webber C, Hehir-Kwa J, Pfundt R, Veltman J, Ponting CP. Reduced purifying selection  
874 prevails over positive selection in human copy number variant evolution. *Genome Res.*  
875 2008;18(11):1711-23. doi:gr.077289.108 [pii]  
10.1101/gr.077289.108.
- 876 63. Liu G, Hou Y, Robl J, Kuroiwa Y, Wang Z. Assessment of genome integrity with array CGH in cattle  
877 transgenic cell lines produced by homologous recombination and somatic cell cloning. *Genome*  
878 *Integrity.* 2011;2(1):6.
- 880 64. Marioni J, Thorne N, Valsesia A, Fitzgerald T, Redon R, Fiegler H et al. Breaking the waves:  
881 improved detection of copy number variation from microarray-based comparative genomic  
882 hybridization. *Genome Biology.* 2007;8(10):R228.
- 883 65. Crawford AM, Cuthbertson RP. Mutations in sheep microsatellites. *Genome Res.* 1996;6(9):876-  
884 9.
- 885 66. Winchester L, Yau C, Ragoussis J. Comparing CNV detection methods for SNP arrays. *Brief Funct*  
886 *Genomic Proteomic.* 2009;8(5):353-66. doi:elp017 [pii]  
10.1093/bfgp/elp017.
- 887 67. Pinto D, Darvishi K, Shi X, Rajan D, Rigler D, Fitzgerald T et al. Comprehensive assessment of  
888 array-based platforms and calling algorithms for detection of copy number variants. *Nat Biotech.*  
889 2011;29(6):512-20.  
890 doi:<http://www.nature.com/nbt/journal/v29/n6/abs/nbt.1852.html#supplementary-information>.
- 891 68. Jenkins G. UMD3\_OA assembly. 2015. [http://www.sheepmap.org/CNV/UMD3\\_OA.tgz](http://www.sheepmap.org/CNV/UMD3_OA.tgz).  
892 Accessed 1 June 2015 2015.
- 893 69. Korf I, Yandell M, Bedell J. BLAST. O'Reilly Media; 2003.
- 894 70. Fontanesi L, Martelli P, Beretti F, Riggio V, Dall'Olio S, Colombo M et al. An initial comparative  
895 map of copy number variations in the goat (*Capra hircus*) genome. *BMC Genomics.* 2010;11(1):639.
- 896 71. Li H, Durbin R. Fast and accurate short read alignment with Burrows–Wheeler transform.  
897 *Bioinformatics.* 2009;25(14):1754-60. doi:10.1093/bioinformatics/btp324.
- 898 72. Li H, Handsaker B, Wysoker A, Fennell T, Ruan J, Homer N et al. The Sequence Alignment/Map  
899 format and SAMtools. *Bioinformatics.* 2009;25(16):2078-9. doi:10.1093/bioinformatics/btp352.
- 900 73. Yoon S, Xuan Z, Makarov V, Ye K, Sebat J. Sensitive and accurate detection of copy number  
901 variants using read depth of coverage. *Genome Res.* 2009;19(9):1586-92. doi:gr.092981.109 [pii]  
902 10.1101/gr.092981.109.
- 903 74. Gay DM. Computing Science Technical Report No.153: Usage summary for selected optimization  
904 routines. 1990.
- 905
- 906

907 **Additional files**

908 **Supplementary table 1**

909 A description of the overlap of the platforms the various animals have been genotyped on.

910 **Supplementary table 2**

911 A list of the positions of the CNV regions on genome build UMD3\_OA

912 **Additional file 1**



913 A description of the results of the cross platform (385K CGH and SNP50 chip) verification of CNV  
914 regions.  
915

916 **Table 1.** Characteristics of CNVs predicted true by the model (n=9,789) and filtered to remove  
 917 artefacts.

| Variable                | Mean      | Median | Std dev    | Min   | Max       |
|-------------------------|-----------|--------|------------|-------|-----------|
| absl2r*                 | 0.54      | 0.43   | 0.36       | 0.25  | 3.47      |
| length (bp)             | 30,332.02 | 8,706  | 107,369.37 | 1,003 | 2,522,449 |
| Datapoints <sup>#</sup> | 14.99     | 9      | 23.91      | 3     | 446       |

918 \*absl2r is the absolute log<sub>2</sub> ratio of the CNV. # number of CGH array probes in the CNV.

919 **Table 2.** Cross platform verification results. Number of CNV calls that were verified and not verified.

|              | Verification platform |                                             |                                        |                                  |
|--------------|-----------------------|---------------------------------------------|----------------------------------------|----------------------------------|
|              | 385K CGH array        | Illumina OvineSNP50 BeadChip - cnvPartition | Illumina OvineSNP50 BeadChip - DNACopy | Sequence analysis ~ 10X coverage |
| Verified     | 17 (1.34%)            | 3 (0.04%)                                   | 101 (1.36%)                            | 714 (61.34%)                     |
| Not verified | 1,251                 | 7,413                                       | 7,315                                  | 450                              |
| Total        | 1,268                 | 7,416                                       | 7,416                                  | 1,164                            |

920

921 **Table 3.** Comparison between CNVRs observed in this study and CNVRs observed in the literature.

| Number of studies CNVR observed in | Number of CNVR | Number of these CNVR identified in this study (%) |
|------------------------------------|----------------|---------------------------------------------------|
| 1                                  | 1,802          | 246 (13.7)                                        |
| 2                                  | 255            | 82 (32.2)                                         |
| 3                                  | 66             | 24 (36.4)                                         |
| 4                                  | 20             | 16 (80.0)                                         |
| 5                                  | 7              | 6 (85.7)                                          |
| 6                                  | 4              | 4 (100)                                           |

922

923 **Table 4.** Description of the pseudo-maximum likelihood derived mixture model for estimating copy

924 number in sequence data.

| Copy number | Distribution                     | Mixture weights                     | Mean                  | Variance                |
|-------------|----------------------------------|-------------------------------------|-----------------------|-------------------------|
| 0           | Half normal,<br>centered on zero | $\pi_0$                             | $\sqrt{2\pi}\sigma_0$ | $\sigma_0^2$            |
| 1           | Normal                           | $\pi_1$                             | $\frac{1}{2}\mu_2$    | $\frac{1}{2}\sigma_2^2$ |
| 2           | Normal                           | $1 - \pi_0 - \pi_1 - \pi_3 - \pi_4$ | $\mu_2$               | $\sigma_2^2$            |
| 3           | Normal                           | $\pi_3$                             | $\frac{3}{2}\mu_2$    | $\frac{3}{2}\sigma_2^2$ |
| 4           | Normal                           | $\pi_4$                             | $\frac{4}{2}\mu_2$    | $\frac{4}{2}\sigma_2^2$ |

925

926

927 **Table 5.** Starting values of parameters estimated by pseudo-maximum likelihood.

| Variable     | Starting value     | Lower bound | Upper bound |
|--------------|--------------------|-------------|-------------|
| $\mu_2$      | $\bar{\mu}$        | $-\infty$   | $\infty$    |
| $\sigma_2^2$ | $\bar{\sigma}_2^2$ | 0           | $\infty$    |
| $\sigma_0^2$ | 1.5                | 0.01        | $\infty$    |
| $\pi_0$      | 0.01               | 0           | 0.05        |
| $\pi_1$      | 0.025              | 0           | 0.2         |
| $\pi_3$      | 0.001              | 0           | 0.2         |
| $\pi_4$      | 0.001              | 0           | 0.05        |

928

929

930

931 **Figure 1. CNVR frequency across animals.**

932 **Figure 2. Number of CNVRs by chromosome length.** Labels correspond to chromosome number.

933 **Figure 3. Cumulative density plot of the distances separating CNVRs.** The red line reflects the  
934 observed pairwise distances between CNVRs, while the blue line reflects the simulated (expected if  
935 CNVRs are uniformly distributed in the genome) distances separating CNVRs.

936 **Figure 4. Selection of CGH array probes to cover OvineSNP50 BeadChip SNP positions.** Two  
937 methods were used to select probe sets to cover SNPs. The first method (a) involved designing at  
938 least one probe to cover the SNP position, with two probes in flanking regions. The second method  
939 (b) involved designing a probe within the 300bp region surrounding the SNP and two probes in  
940 flanking regions.

941

942 **Figure 5. Pedigree of International Mapping Flock (IMF) animals assayed on the Roche NimbleGen**  
943 **2.1M CGH array.** Some animals (green) appear in more than one pedigree. Segment calls from  
944 animals IMF66, IMF91, IMF95, IMF108 and IMF112 (red) were removed from the analysis due to  
945 failed 2.1M CGH arrays.

946

947

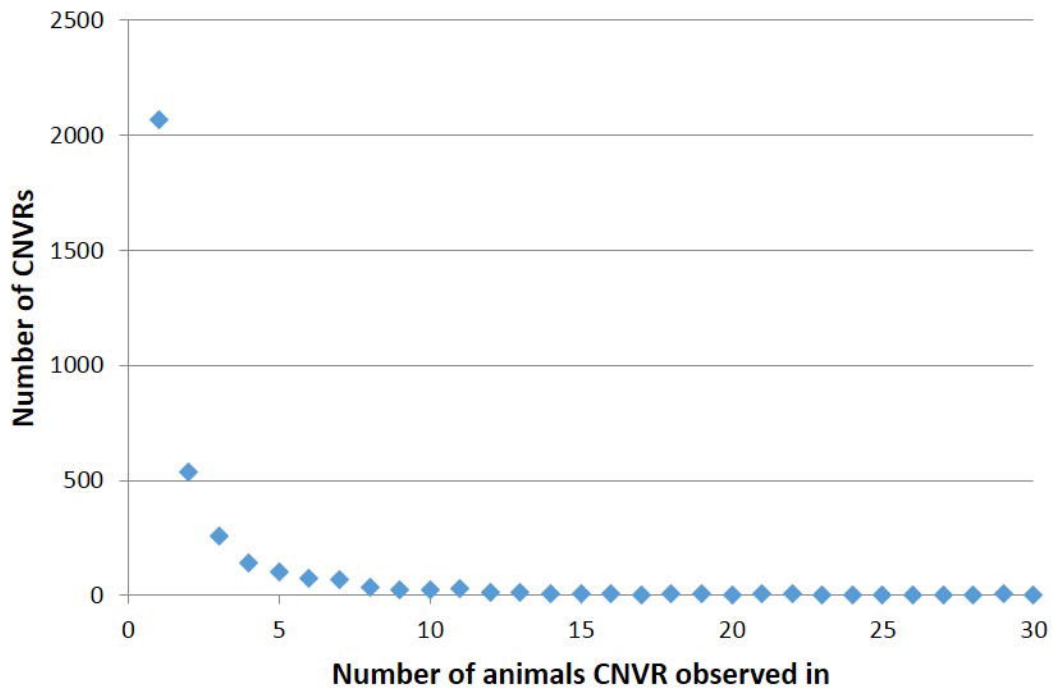

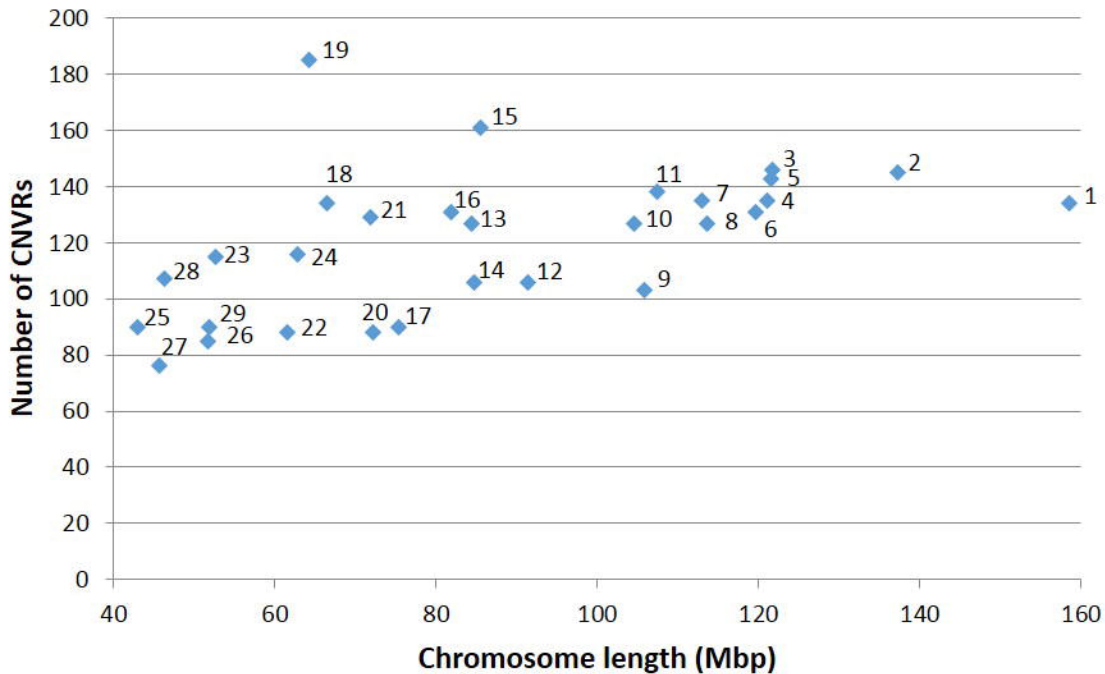

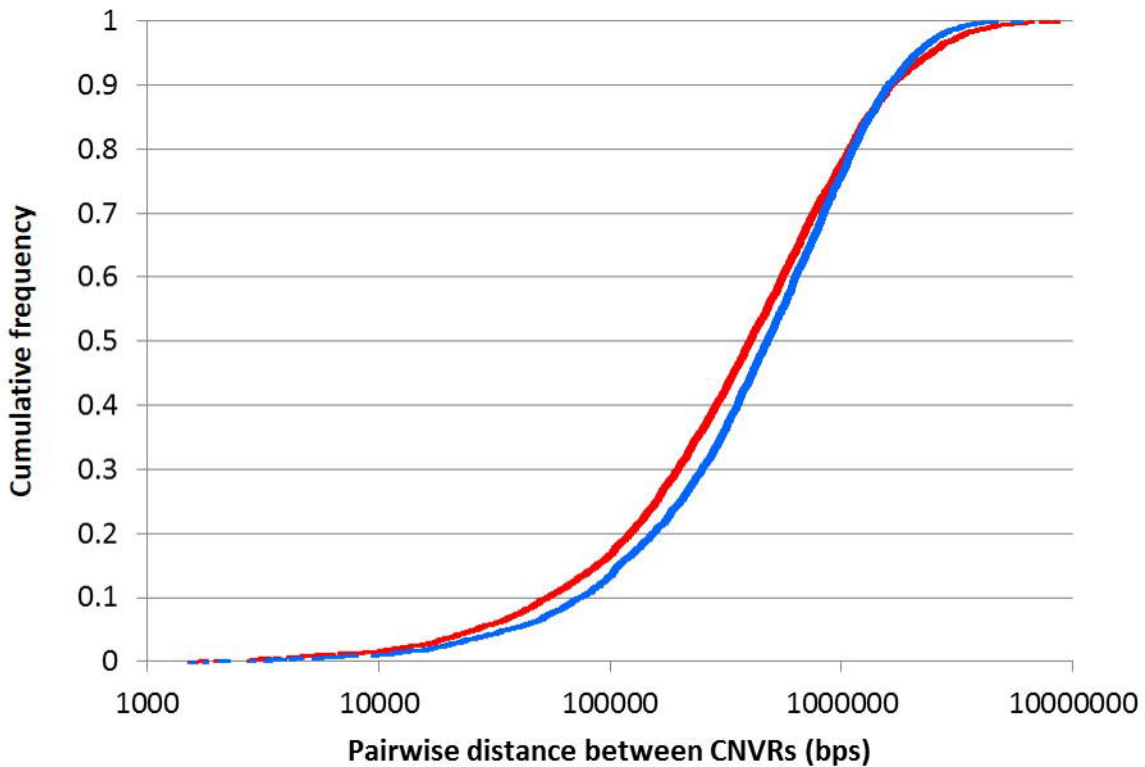

## 2a. Probe selection – method one

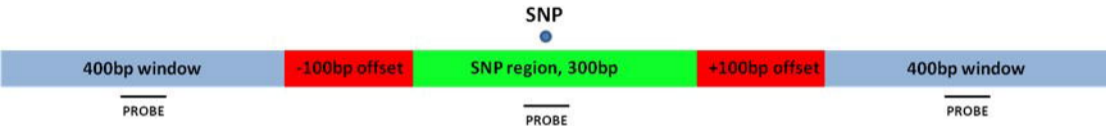

## 2b. Probe selection – method two

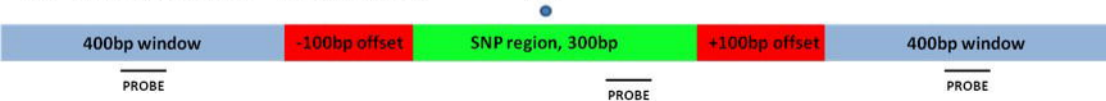



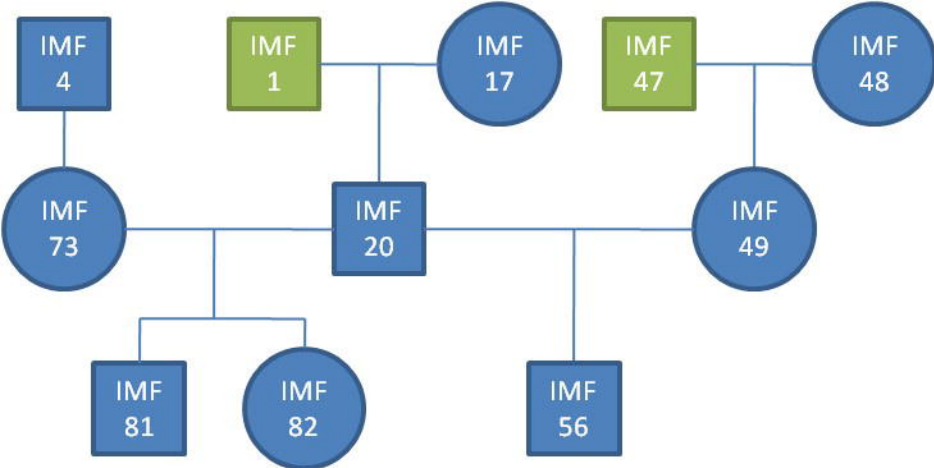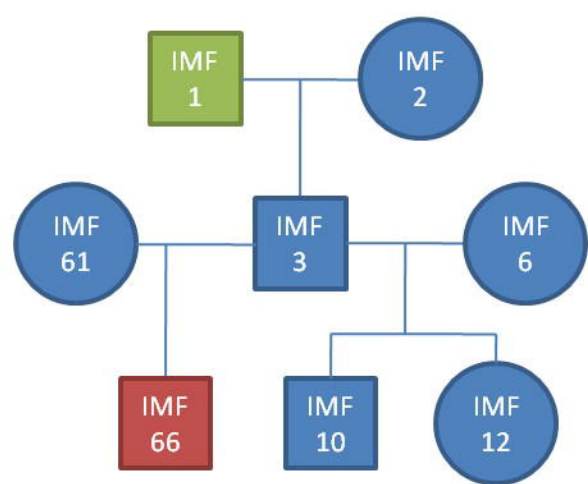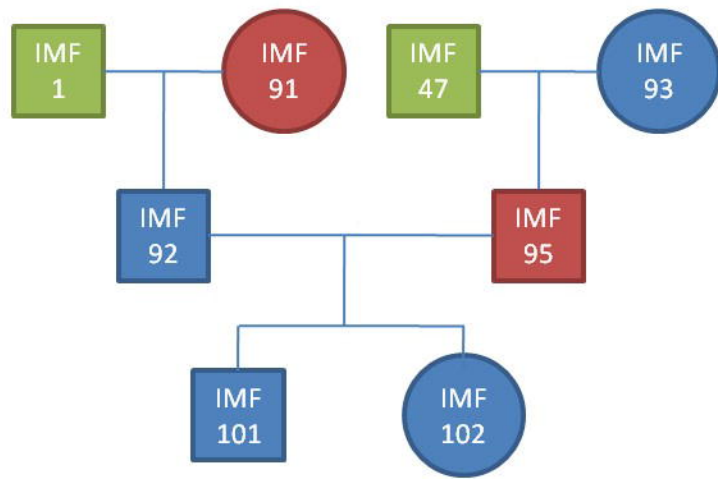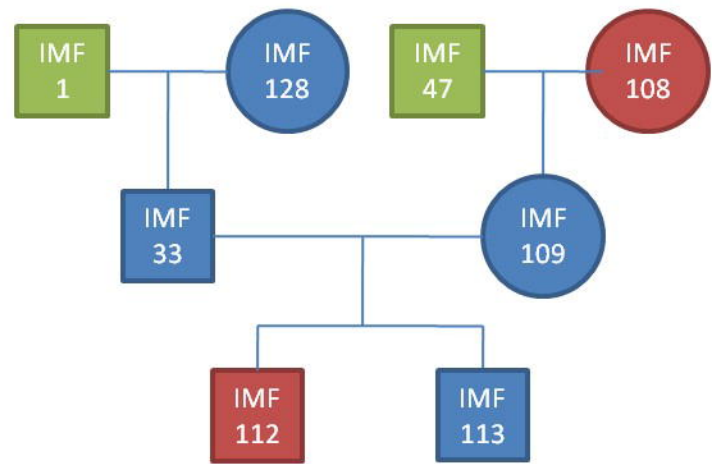

Source: http://biorxiv.org/content/10.1101/041475v2.full.pdf
